# Supplementary material for: Preparation and characterization of μ-nitrido diiron phthalocyanines with electron-withdrawing substituents: application for catalytic aromatic oxidation
Source: Royal Society of Chemistry journal article supplement (doi:10.1039/b902592h), 2009-01-01
Supplement: b902592h.pdf [file b902592h.pdf]

## Supporting Online Information for

### **Preparation and characterization of $\mu$ -nitrido diiron phthalocyanines with electronwithdrawing substituents: application for catalytic aromatic oxidation.**

Ümit İşci, Pavel Afanasiev, Jean-Marc Millet, Evgeny V. Kudrik, Vefa Ahsen and Alexander B. Sorokin\*

\* To whom correspondence should be addressed.

E-mail: alexander.sorokin@ircelyon.univ-lyon1.fr

Supplementary Figures S1 to S6

a)

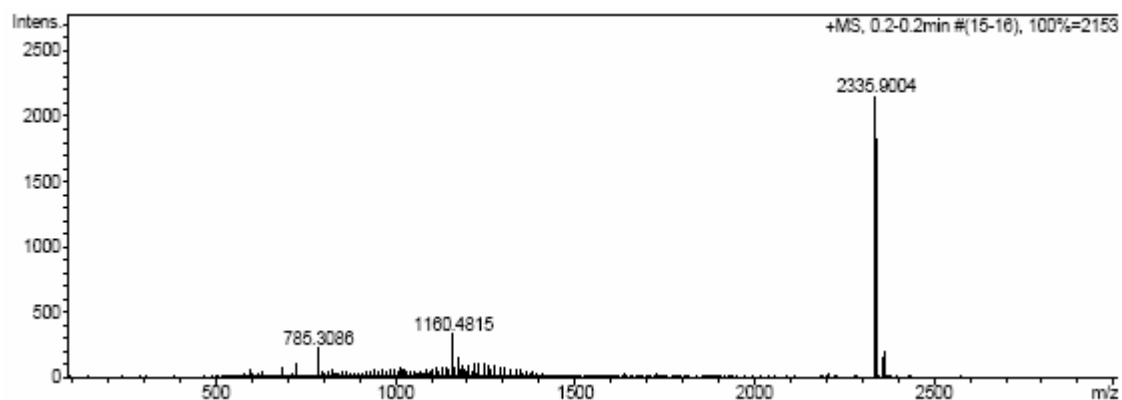

b)

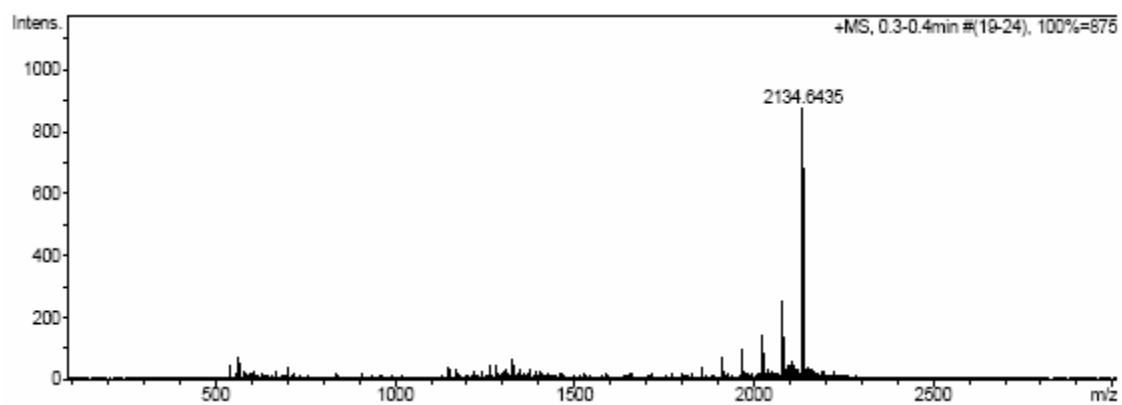

**Supplementary Figure 1.** ESI-MS spectra of **3a** (a) and **3b** (b).

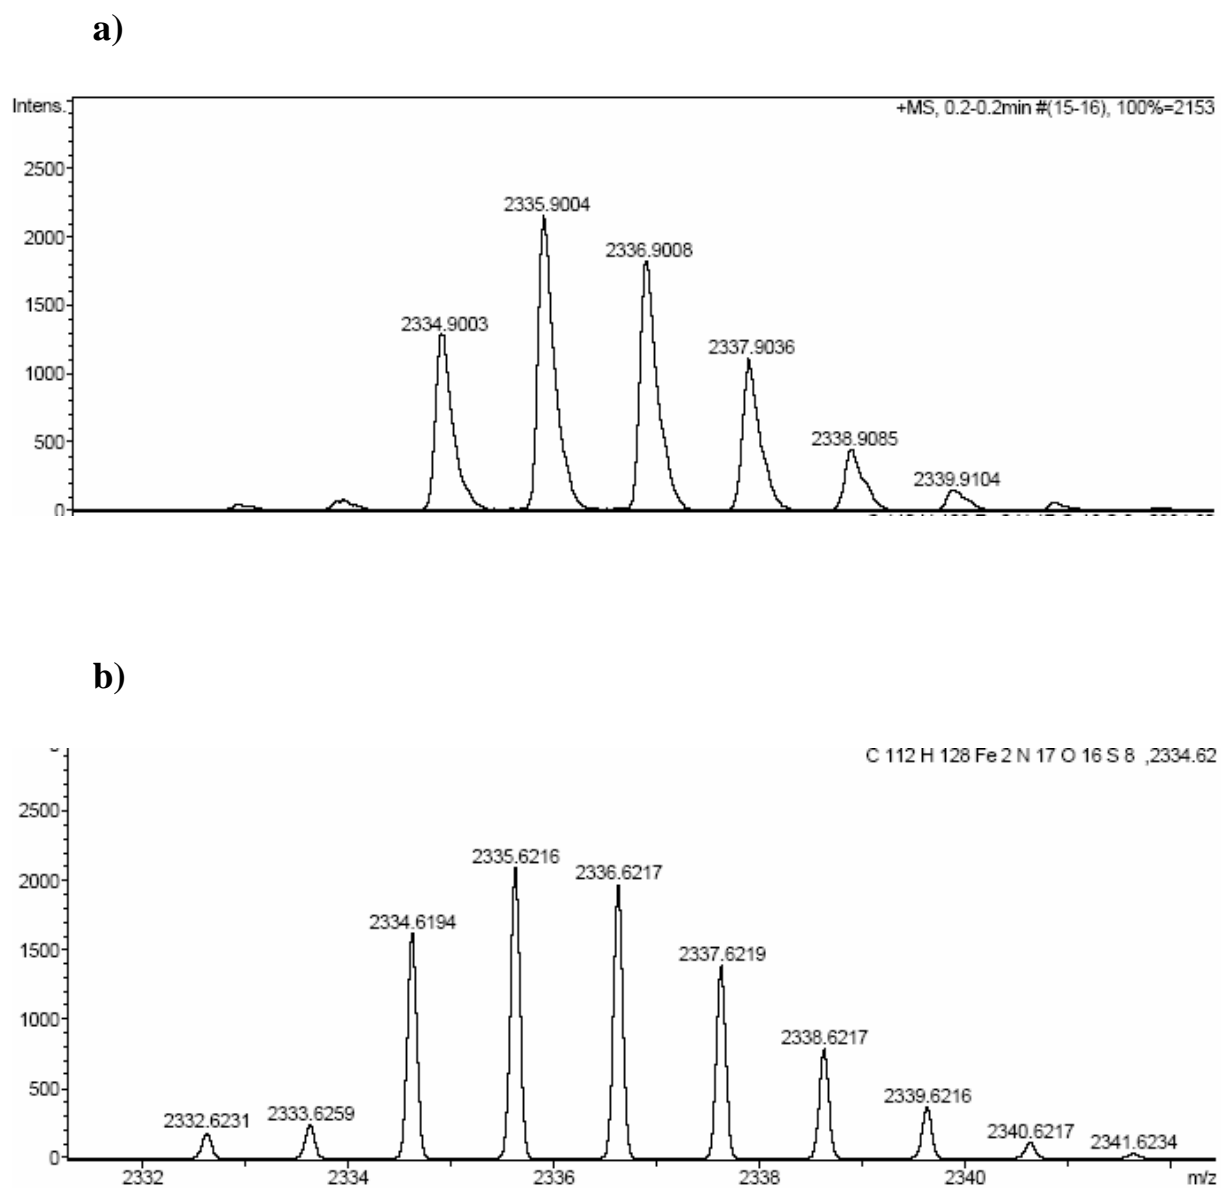

**Supplementary Figure 2.** Molecular peak cluster of **3a** in ESI-MS spectrum (a) and simulated molecular peak cluster for **3a**, C<sub>112</sub>H<sub>128</sub>N<sub>17</sub>O<sub>16</sub>S<sub>8</sub>Fe<sub>2</sub> (b).

**a)**

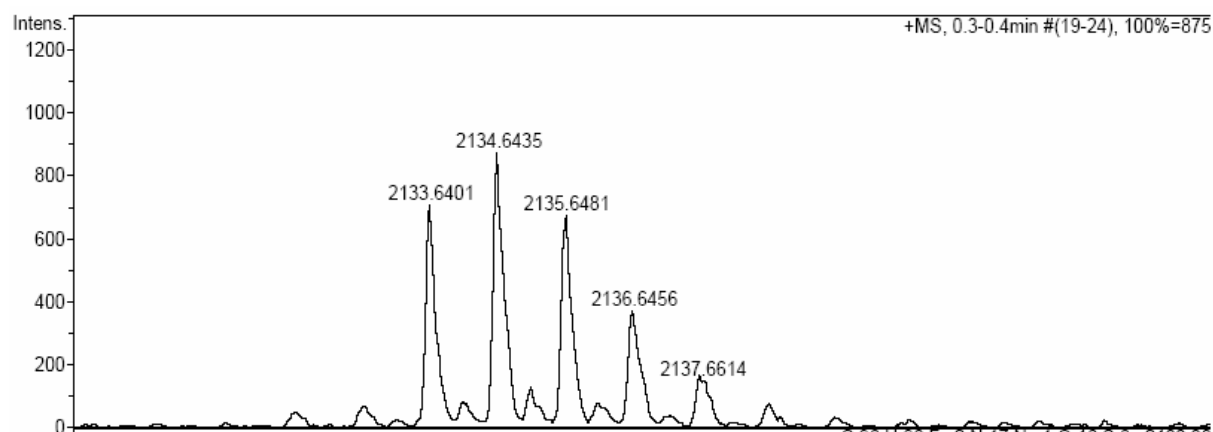

**b)**

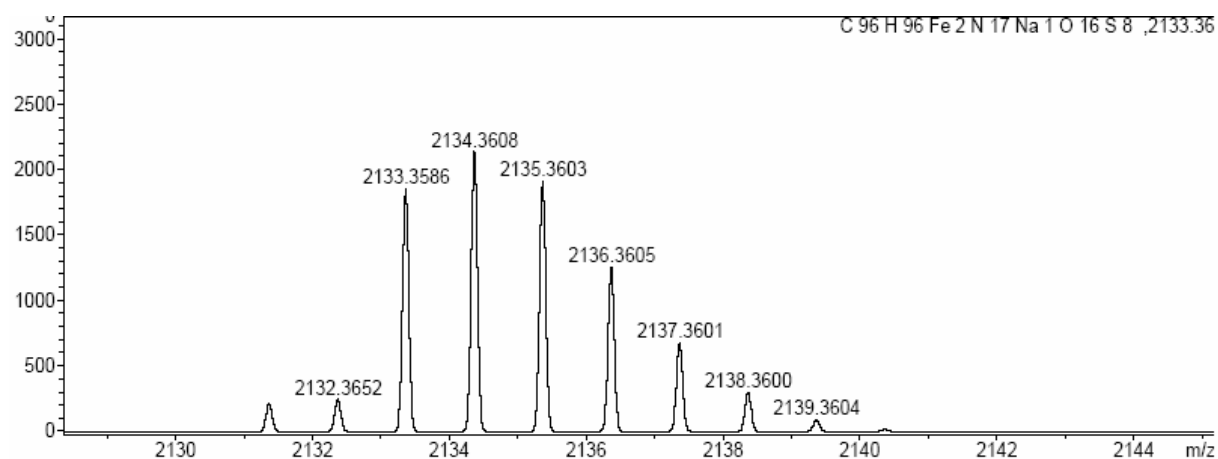

**Supplementary Figure 3.** Molecular peak cluster of  $(\mathbf{3b} + \text{Na})^+$  in ESI-MS spectrum (a) and simulated molecular peak cluster for  $(\mathbf{3b} + \text{Na})^+$ , C<sub>96</sub>H<sub>96</sub>N<sub>17</sub>O<sub>16</sub>S<sub>8</sub>Fe<sub>2</sub>Na (b).

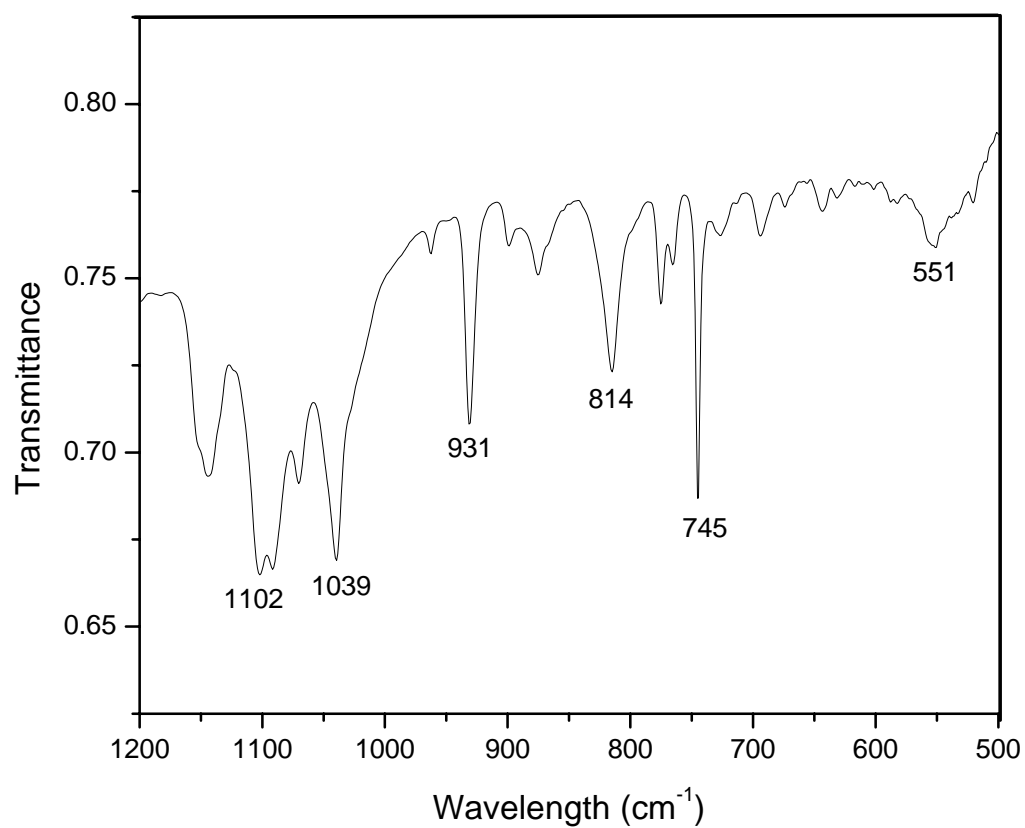

**Supplementary Figure 4.** IR of 3a.

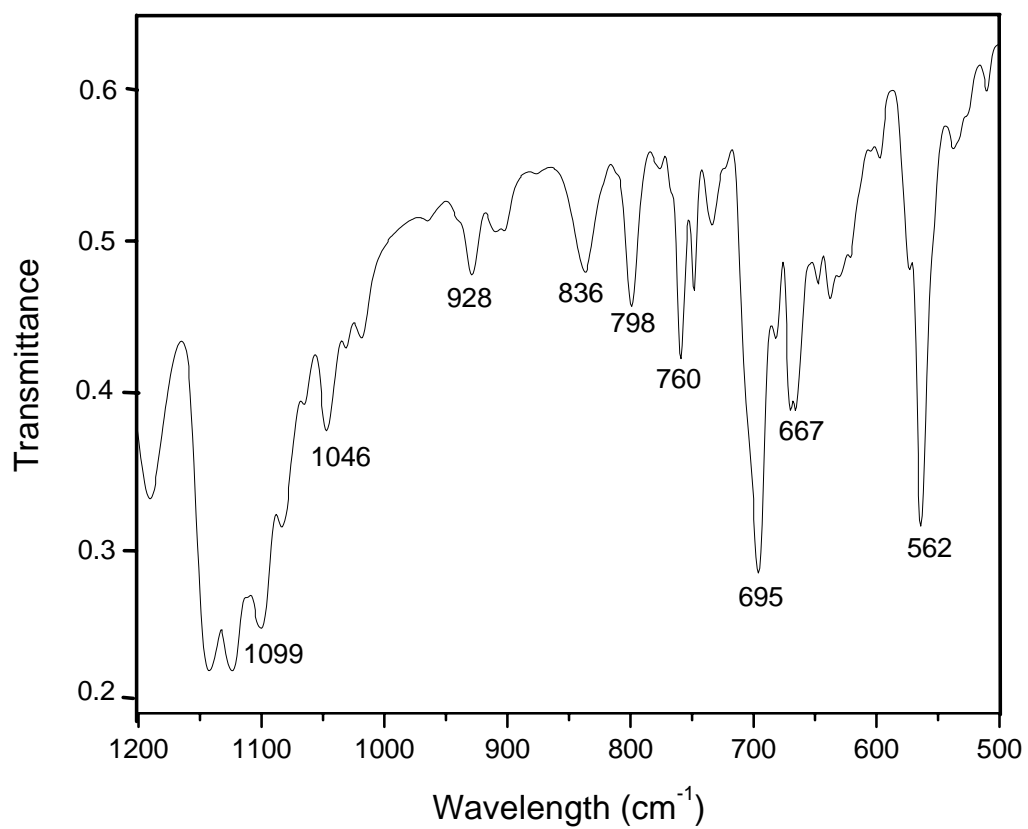

**Supplementary Figure 5. IR of 3b.**

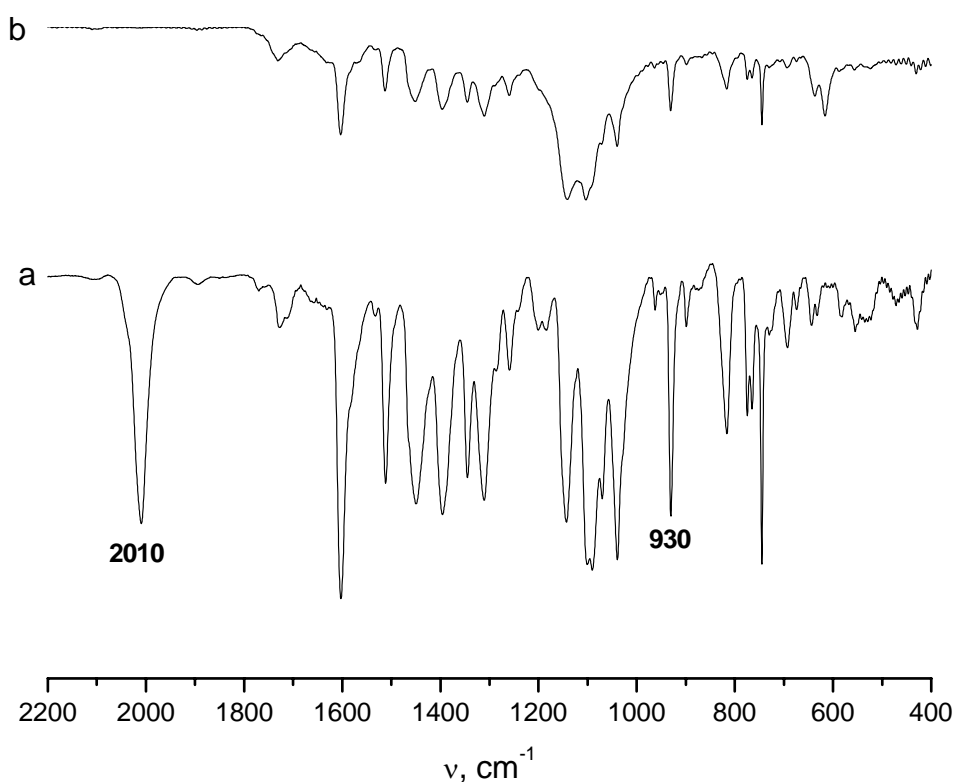

**Supplementary Figure 6.** IR spectrum of **3a** before (a) and after reduction with  $\text{Na}_2\text{S}_2\text{O}_4$  (b). Procedure for the reduction of **3a**: 20 mL of  $10^{-3}$  M **3a** solution in  $\text{CH}_2\text{Cl}_2$  were stirred with 100 mL of deoxygenated 0.02 M  $\text{Na}_2\text{S}_2\text{O}_4$  solution for 5 min. Organic layer was separated and washed with water. The solvent was evaporated under reduced pressure. The product was dried.
